# Supplementary material
Source: PubMed Central journal article supplement (PMC4995543)

Distributions Genome-wide Polygenic Scores at P-Value Threshold 0.05

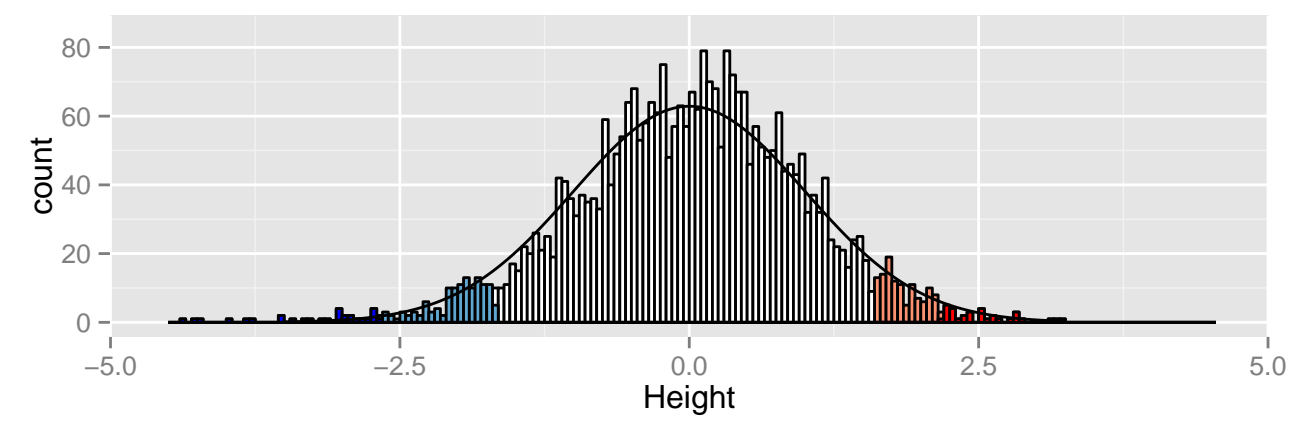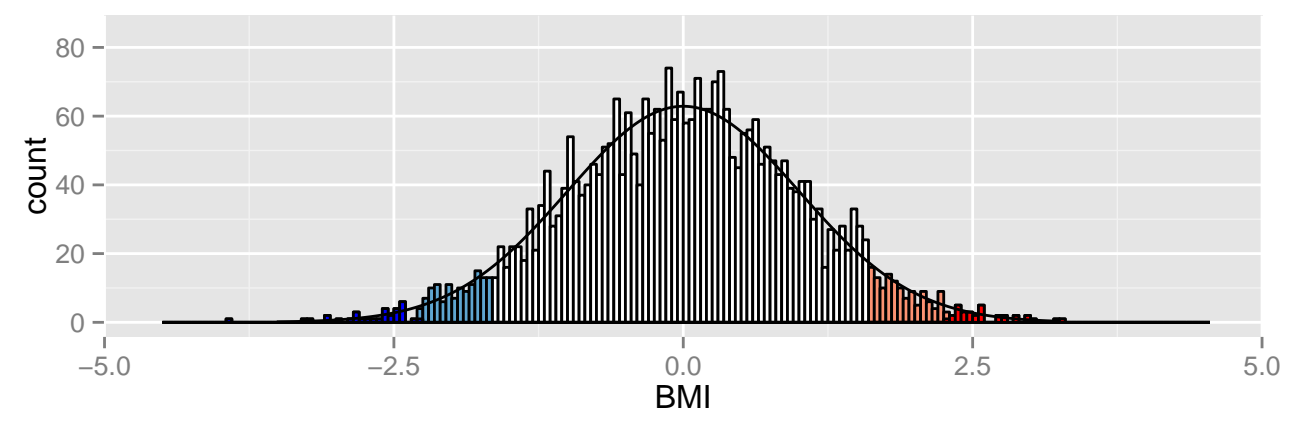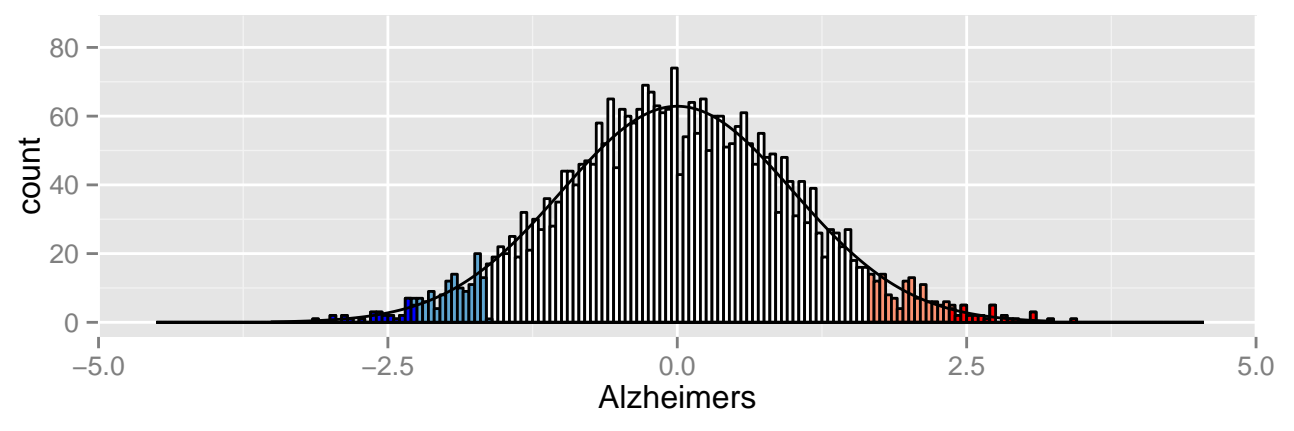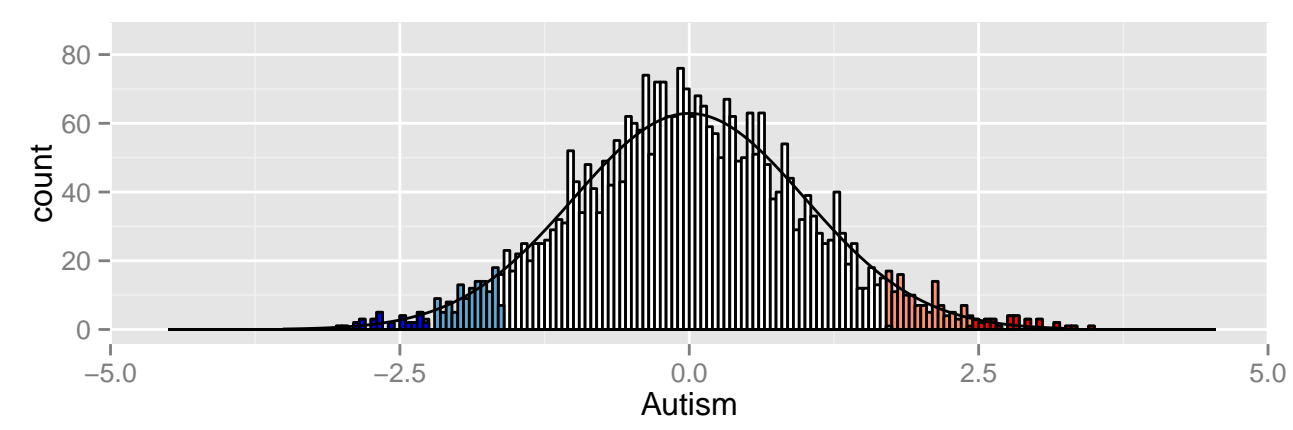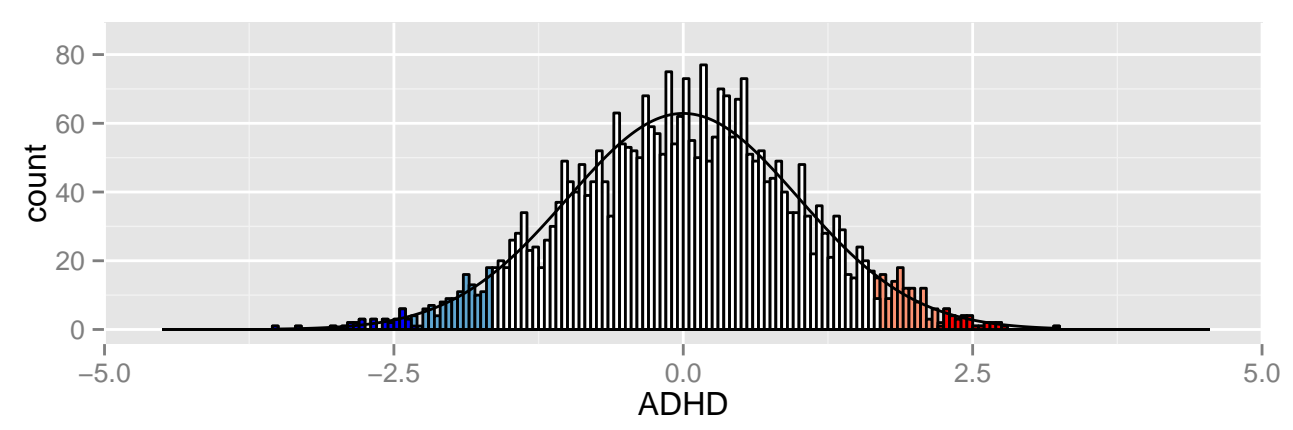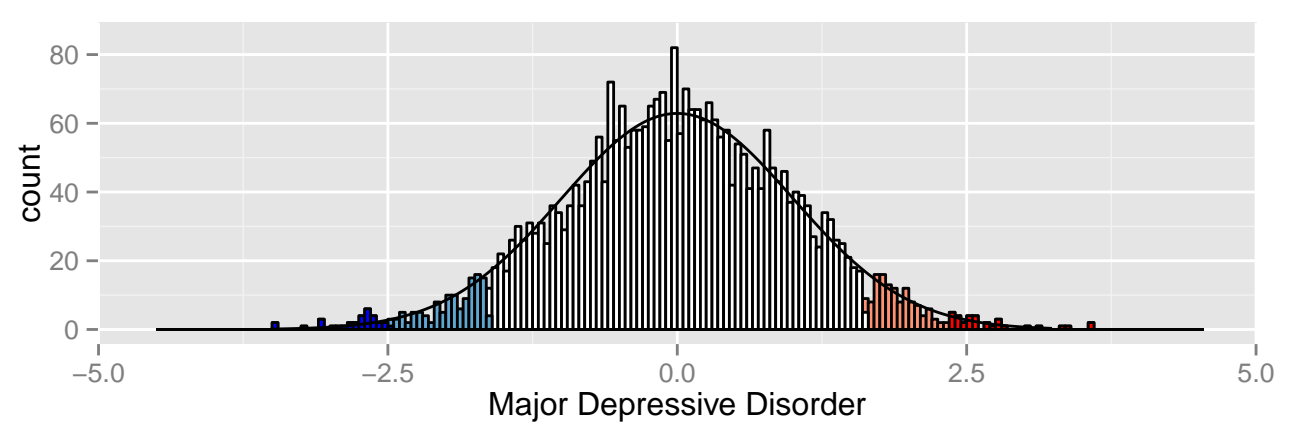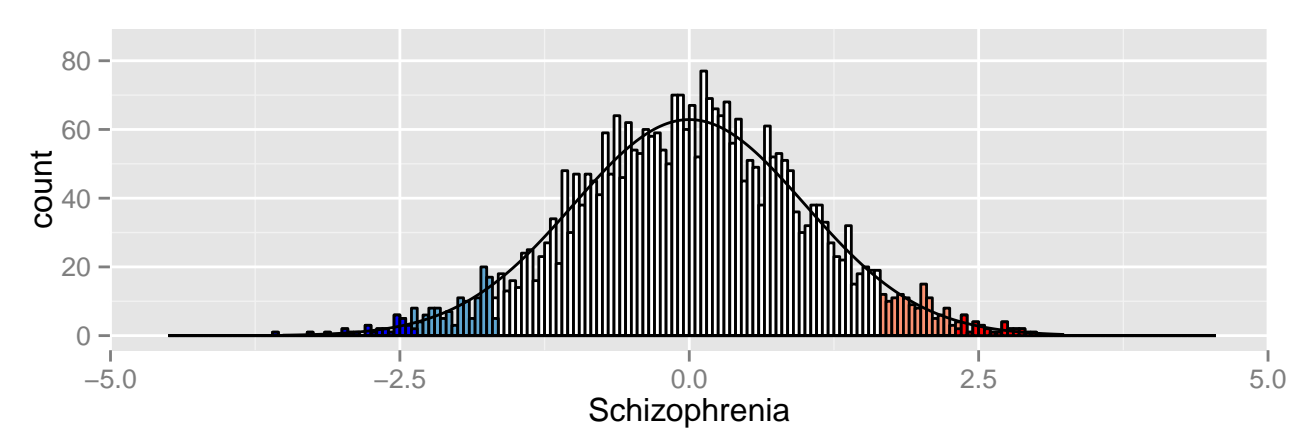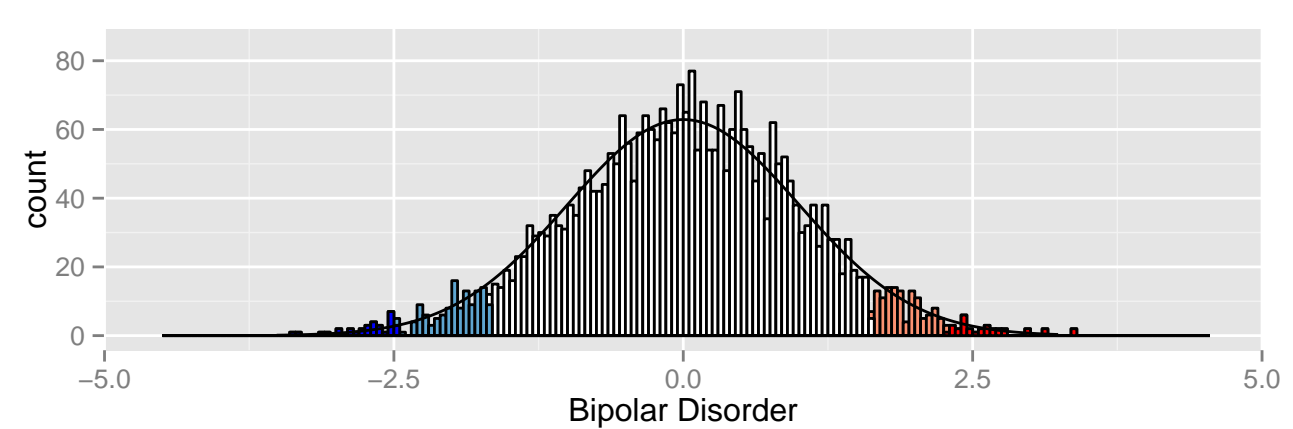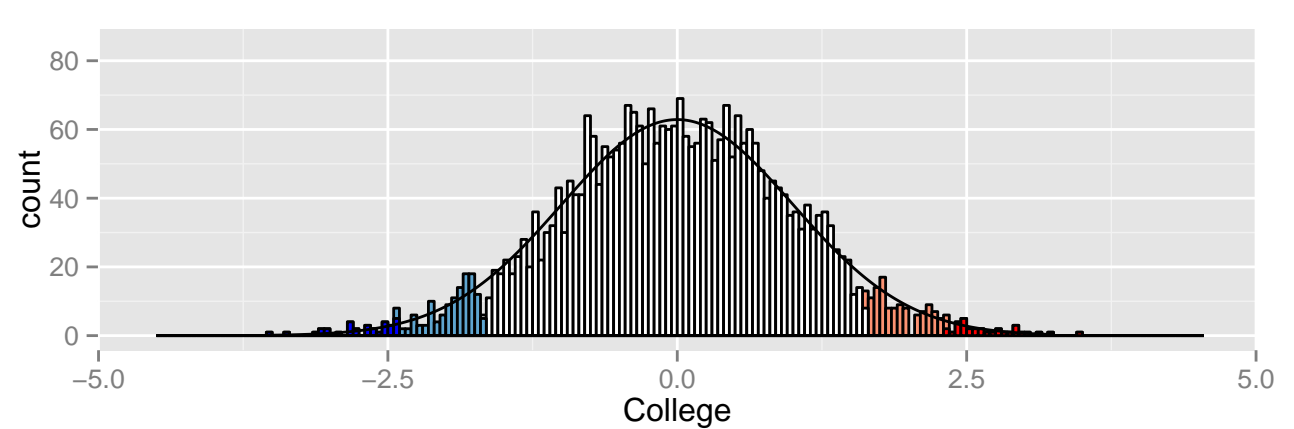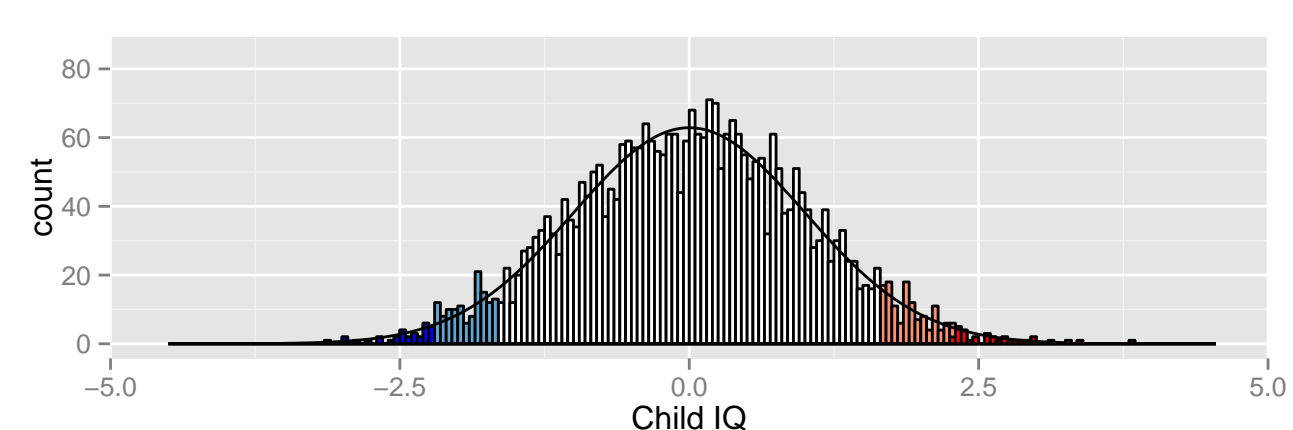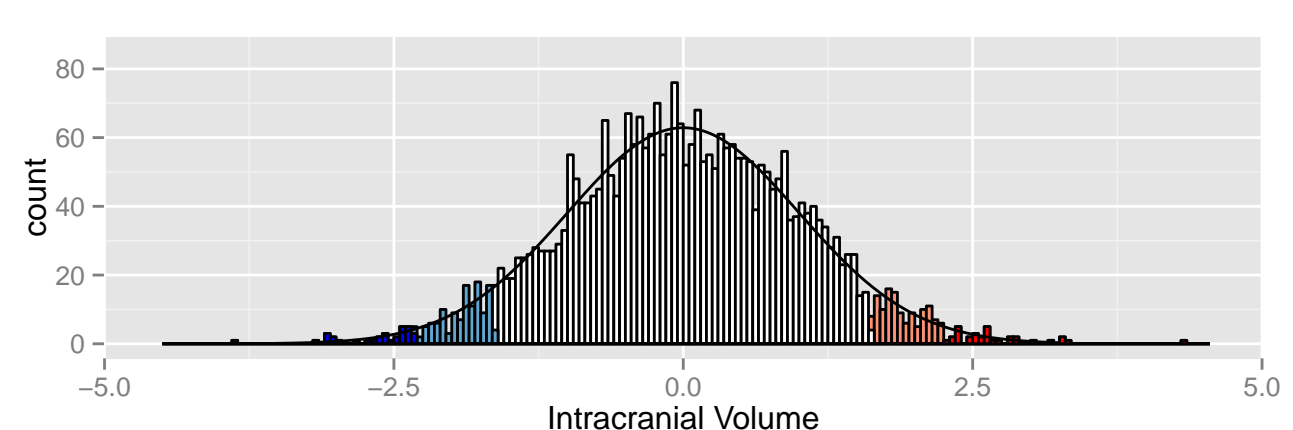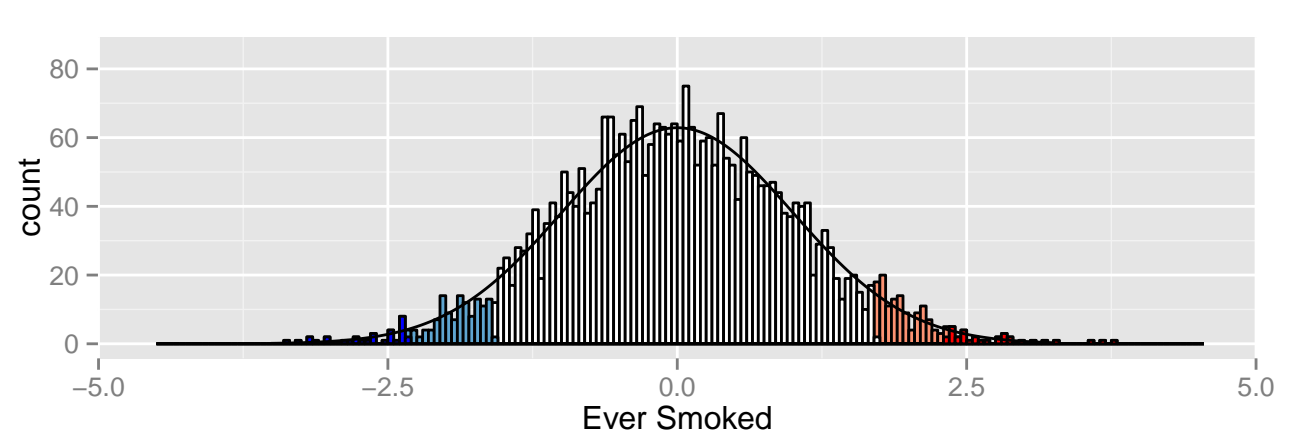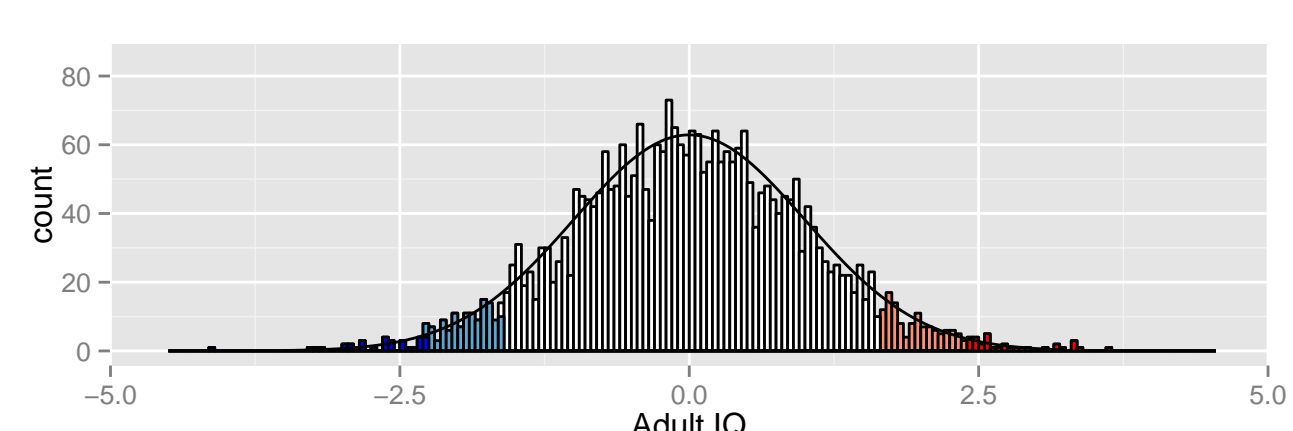

Supplement: mp2015126x6.pdf [file mp2015126x6.pdf]
