# Supplementary material
Source: PubMed Central journal article supplement (PMC4995543)

# Genetic Correlations among 13 GWAS

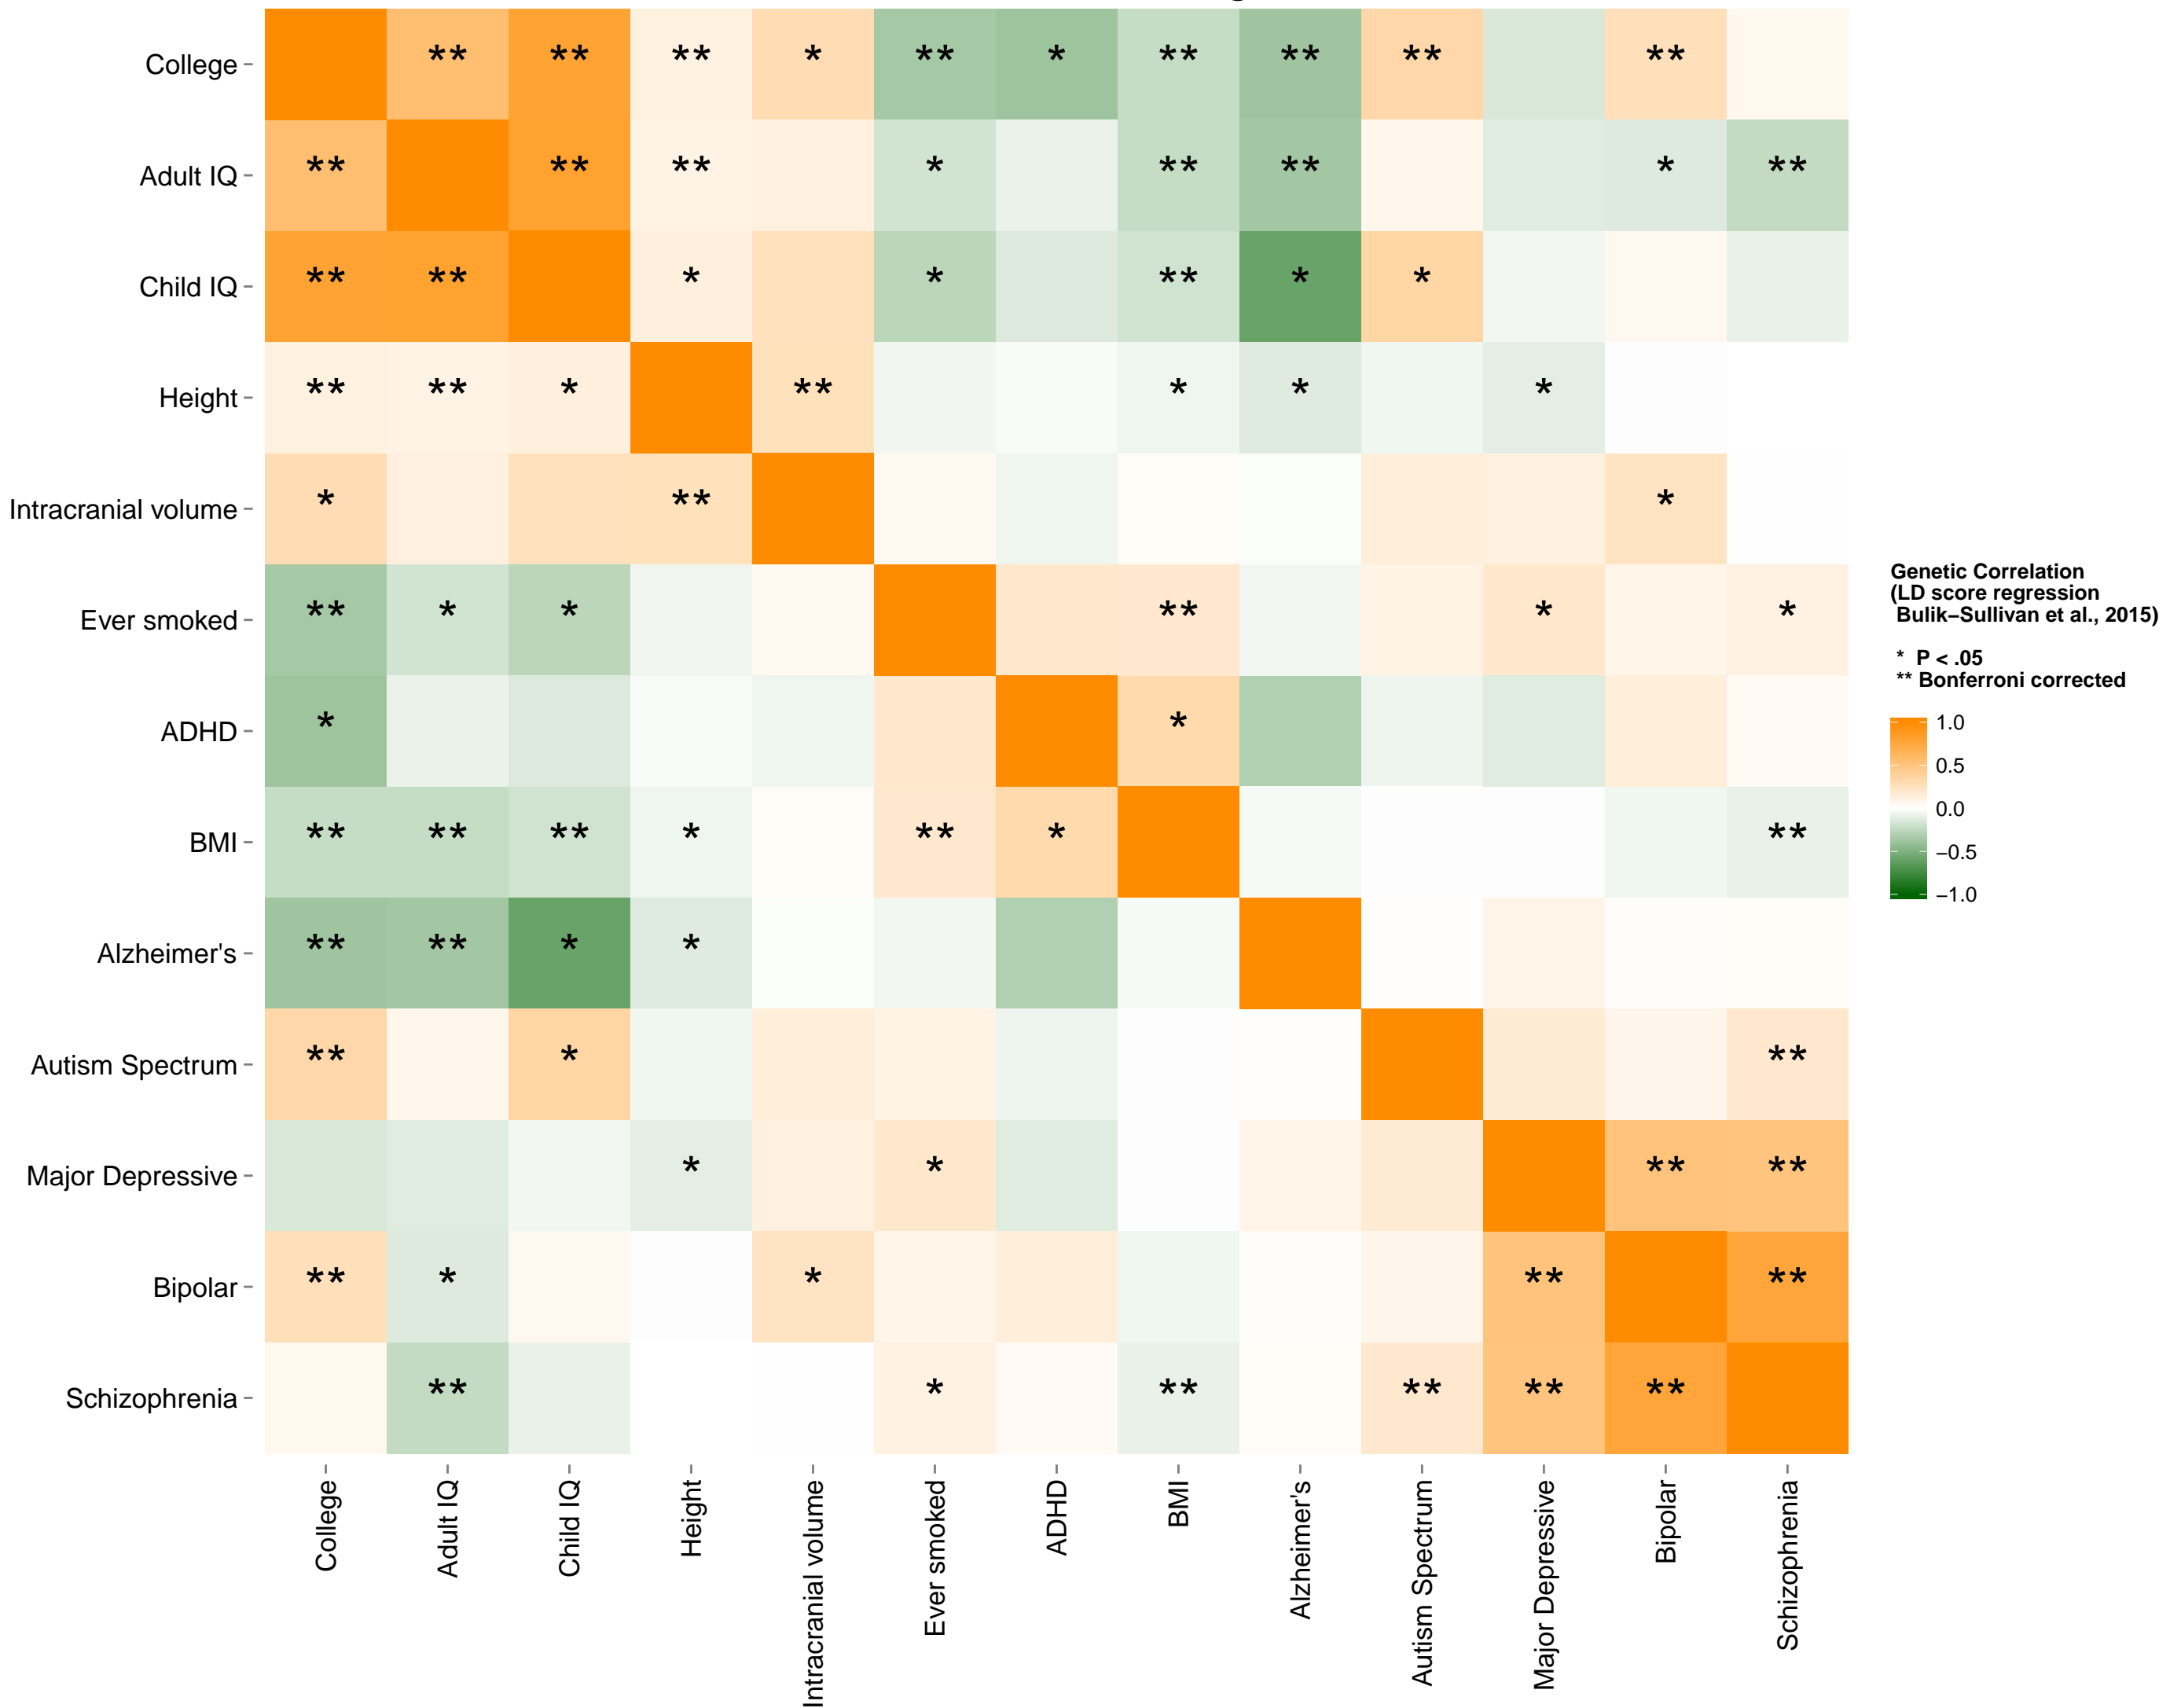

Supplement: mp2015126x8.pdf [file mp2015126x8.pdf]
