# Supplementary material
Source: PubMed Central journal article supplement (PMC4995543)

# Correlations Genome-wide Polygenic Scores pT = 0.30

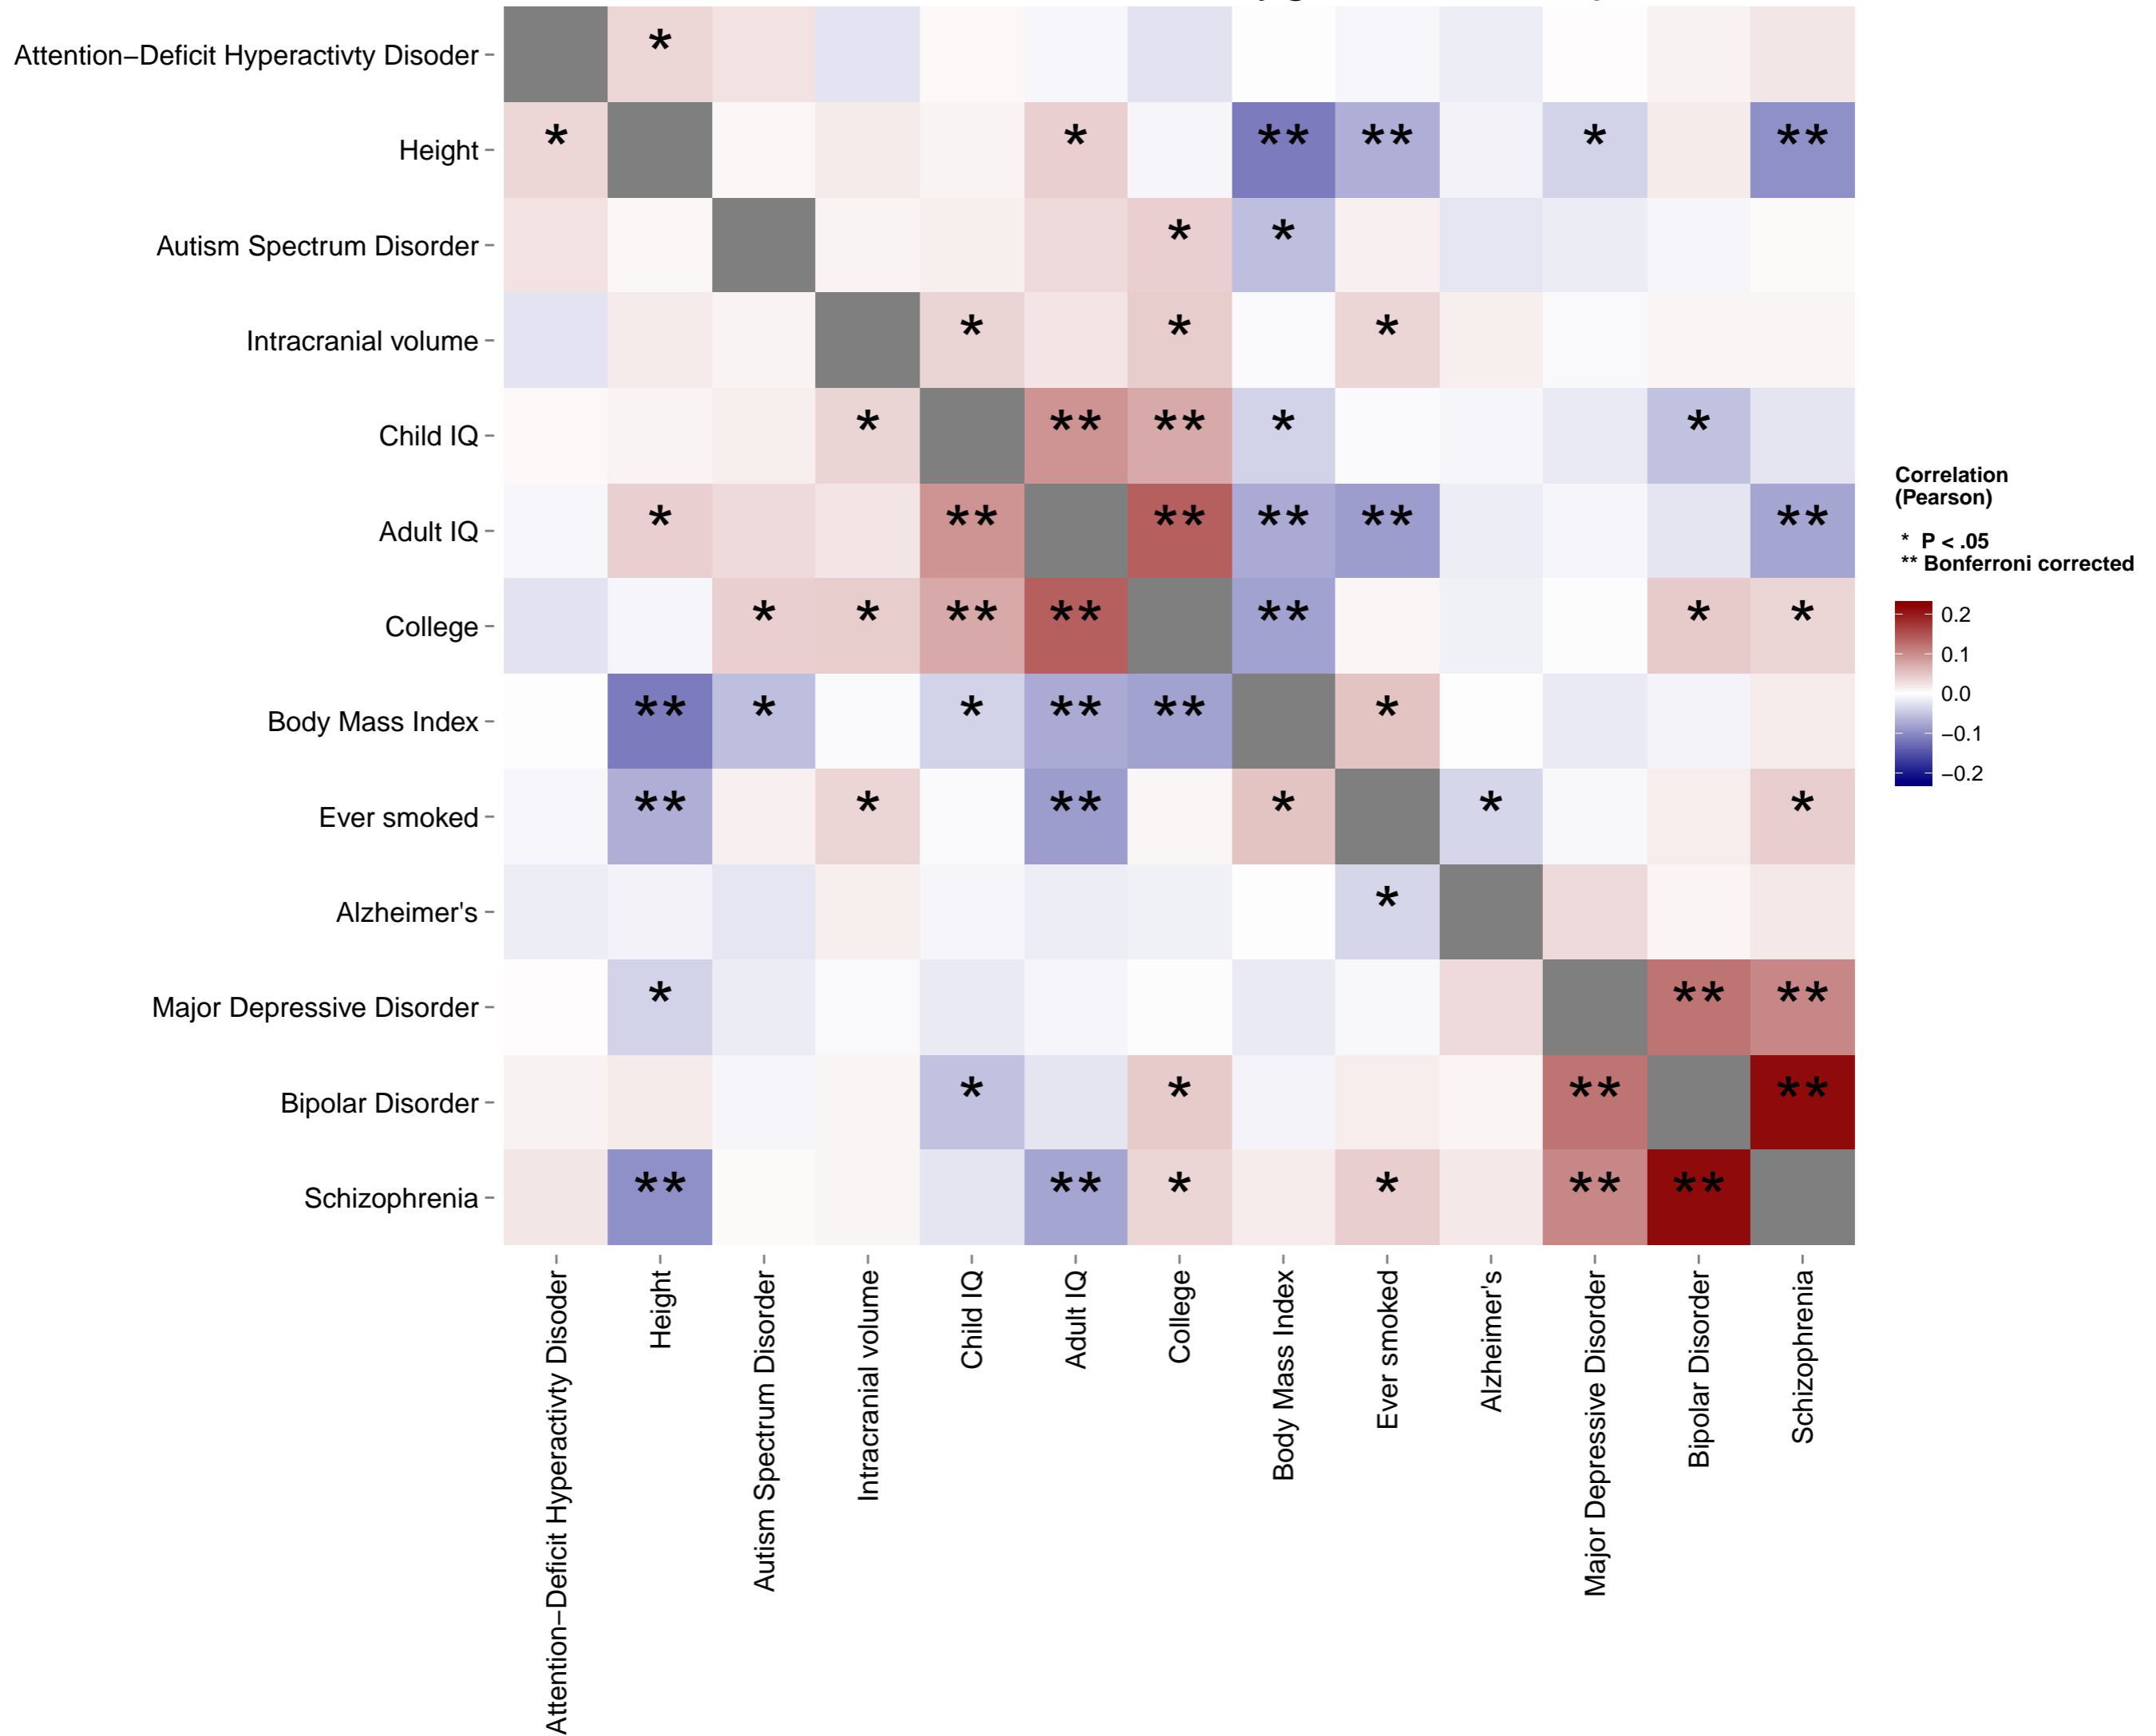

Supplement: mp2015126x9.pdf [file mp2015126x9.pdf]
