# Supplementary material
Source: PubMed Central journal article supplement (PMC4995543)

# Correlations Genome-wide Polygenic Scores pT = 0.10

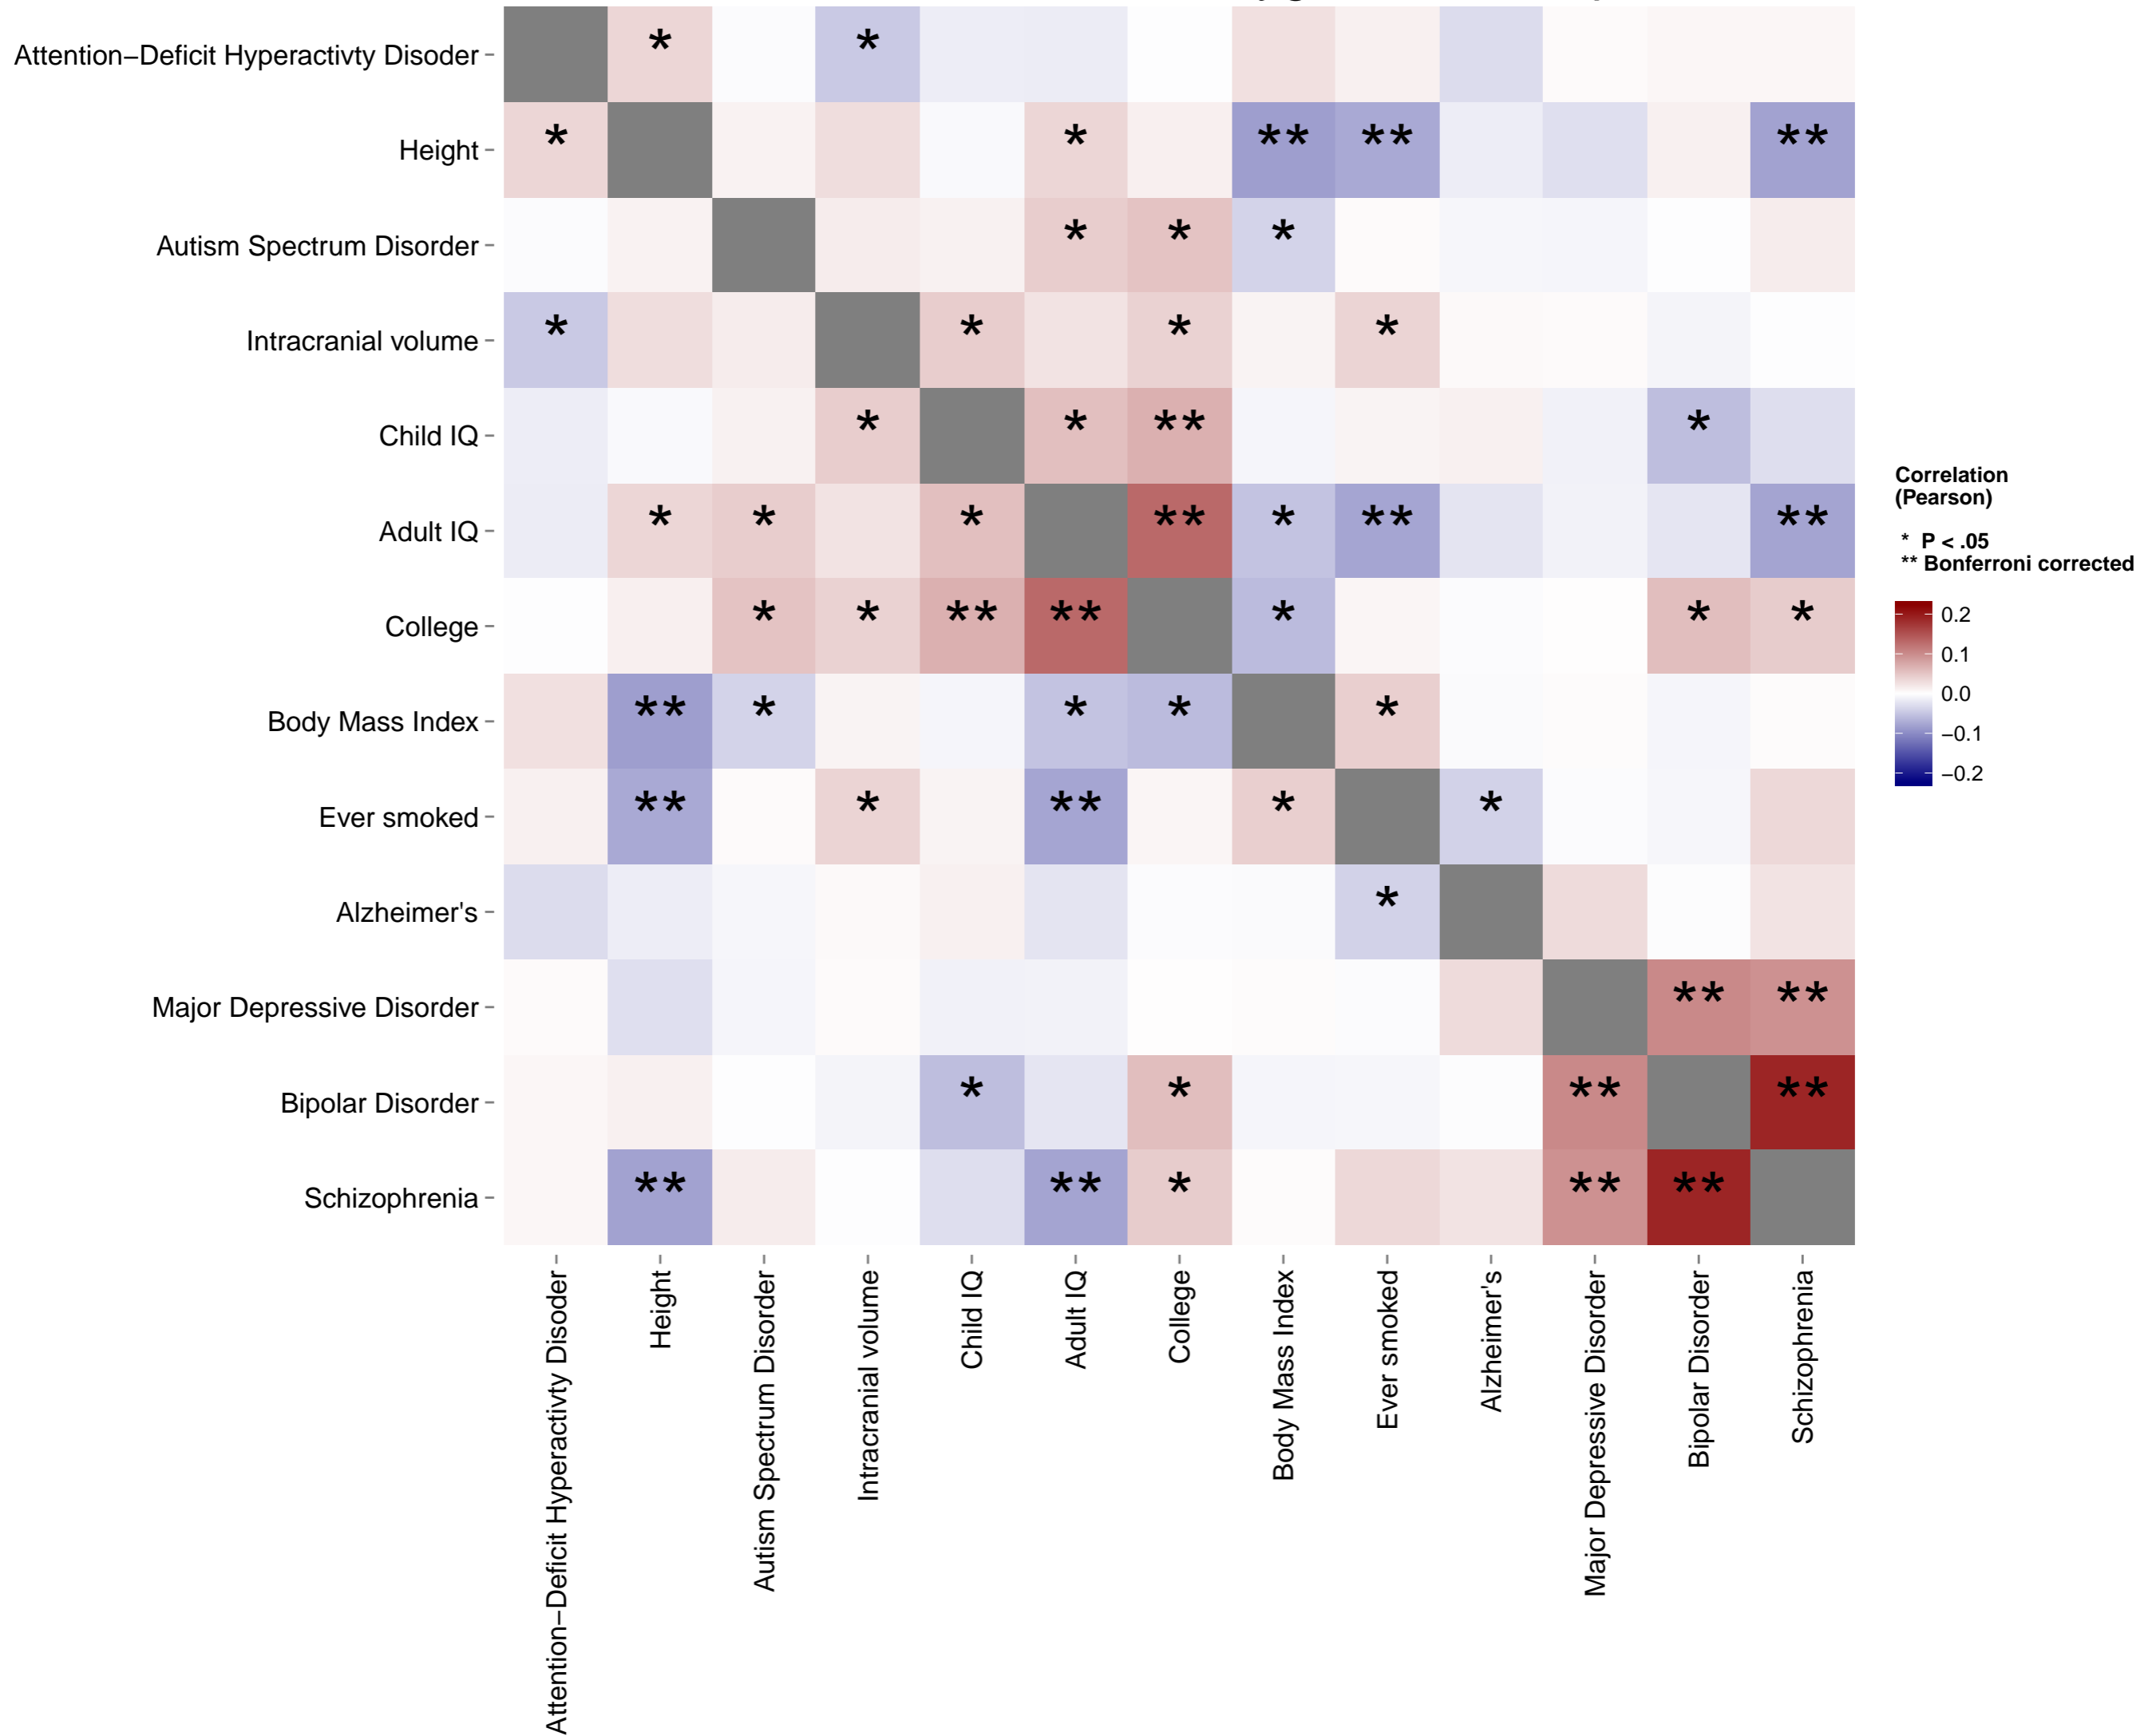

Supplement: mp2015126x10.pdf [file mp2015126x10.pdf]
