# Supplementary material
Source: PubMed Central journal article supplement (PMC4995543)
Supplement: mp2015126x12.pdf [file mp2015126x12.pdf]

**Supplementary Figure 6a-c.** Correlations between 13 genome-wide polygenic scores. These results are based on GPS constructed using a GWAS  $P_T = 0.30, 0.10,$  and  $0.05$ .  $P$ -values that pass Bonferroni correction are indicated with two asterisks, while those reaching nominal significance (thus suggestive evidence) are shown with a single asterisk.
