# Supplementary material
Source: PubMed Central journal article supplement (PMC4995543)
Supplement: mp2015126x16.pdf [file mp2015126x16.pdf]

|                                                     | Returned data<br>(N families) | % parents A-<br>levels or<br>higher | % Mother<br>employed | % Father<br>employed | % Female |
|-----------------------------------------------------|-------------------------------|-------------------------------------|----------------------|----------------------|----------|
| UK census <sup>a</sup>                              | --                            | 32%                                 | 49%                  | 89%                  | 50%      |
| TEDS 1 <sup>st</sup> contact<br>genotyped subsample | 3,152                         | 29%                                 | 47%                  | 89%                  | 54%      |
| TEDS age 16<br>genotyped subsample                  | 2,886                         | 31%                                 | 47%                  | 89%                  | 55%      |

<sup>a</sup> The UK 2001 census data (ONS, 2001) for families with children were used because they represent more appropriate comparisons than UK 2011 census data for TEDS twins who were born 1994 -1996.
