# Supplementary material
Source: PubMed Central journal article supplement (PMC4995543)
Supplement: mp2015126x17.pdf [file mp2015126x17.pdf]

| <b>Trait</b>                             | <b>binary/continuous</b> | <b>Sample size</b> | <b>Reference</b>                              |
|------------------------------------------|--------------------------|--------------------|-----------------------------------------------|
| College                                  | binary                   | 120,917            | Rietveld, et al., Science, 2013               |
| Adult IQ                                 | continuous               | 53,949             | Davies, et al., Mol Psych, 2015               |
| Child IQ                                 | continuous               | 9,616*             | Benyamin, et al., Mol Psych, 2014             |
| Intracranial Volume                      | continuous               | 11,373             | Hibar, et al., Nature, 2015                   |
| Alzheimer's disease                      | binary                   | 54,162             | Lambert, et al., Nat Genet, 2013              |
| Bipolar disorder                         | binary                   | 16,731             | PGC Bipolar Working Group, Nat Genet, 2011    |
| Major Depressive Disorder                | binary                   | 18,759             | PGC MDD Working Group, Mol Psych, 2013        |
| Schizophrenia                            | binary                   | 70,100             | PGC Schizophrenia Working Group, Nature, 2014 |
| Attention-Deficit Hyperactivity Disorder | binary                   | 5,422              | PGC Cross-Disorder Group, Lancet, 2013        |
| Autism Spectrum Disorder                 | binary                   | 10,263             | PGC Cross-Disorder Group, Lancet, 2013        |
| Body Mass Index                          | continuous               | 322,154            | Locke, et al., Nat Genet, 2015                |
| Height                                   | continuous               | 253,280            | Wood, et al., Nat Gen, 2014                   |
| Ever/Never Smoked                        | binary                   | 74,035             | TAG Consortium, Nat Genet, 2010               |
